# Supplementary material
Source: MDPI journal article supplement (https://www.mdpi.com/2571-9408/5/3/78)
Supplement: s1 [file s1]

Table S1 – CIELAB colour coordinates before (t=0) and after exposure to weathering (t=3 months) measured with a portable spectrophotometer in SCE mode.

|           |                          | <b>*L</b>               | <b>a*</b>             | <b>*b</b>             | <b>C*<sub>ab</sub></b> |
|-----------|--------------------------|-------------------------|-----------------------|-----------------------|------------------------|
|           |                          | <b>SCE</b>              |                       |                       |                        |
| <b>AB</b> | <b>t=0</b>               | 58,44                   | 1,11                  | 7,40                  | 7,48                   |
|           |                          | 58,55                   | 0,86                  | 7,10                  | 7,15                   |
|           |                          | 58,53                   | 1,08                  | 7,37                  | 7,45                   |
|           | .                        | <b>58,51± 0,06 (a)</b>  | <b>1,02± 0,14 (a)</b> | <b>7,29± 0,17 (a)</b> | <b>7,36± 0,18 (a)</b>  |
|           | <b>t= 3 m.</b>           | 57,81                   | 0,50                  | 5,38                  | 5,40                   |
|           |                          | 60,18                   | 0,43                  | 5,25                  | 5,27                   |
|           |                          | 58,33                   | 0,41                  | 4,88                  | 4,90                   |
|           | Av                       | <b>58,77± 1,25 (a)</b>  | <b>0,45± 0,05 (b)</b> | <b>5,17± 0,26 (b)</b> | <b>5,19± 0,26 (b)</b>  |
|           | <b>ΔE</b>                | <b>3,34</b>             |                       |                       |                        |
|           | <b>Δ C*<sub>ab</sub></b> | <b>-2,17</b>            |                       |                       |                        |
|           | <b>ΔL</b>                | <b>0,27</b>             |                       |                       |                        |
|           | <b>Δa*</b>               | <b>2,57</b>             |                       |                       |                        |
|           | <b>Δb*</b>               | <b>-2,12</b>            |                       |                       |                        |
| <b>AV</b> | <b>t=0</b>               | 43,50                   | 1,02                  | 6,20                  | 6,28                   |
|           |                          | 43,55                   | 0,95                  | 6,04                  | 6,11                   |
|           |                          | 43,40                   | 0,93                  | 6,08                  | 6,15                   |
|           | Av                       | <b>43,48 ± 0,08 (a)</b> | <b>0,97± 0,05 (a)</b> | <b>6,11± 0,08 (a)</b> | <b>6,18±0,09 (a)</b>   |
|           | <b>t=3 m.</b>            | 53,78                   | 0,14                  | 4,10                  | 4,10                   |
|           |                          | 54,41                   | -0,06                 | 3,70                  | 3,70                   |
|           |                          | 53,70                   | 0,06                  | 3,92                  | 3,92                   |
|           | Av                       | <b>53,96± 0,39 (b)</b>  | <b>0,05± 0,10 (b)</b> | <b>3,91± 0,20 (b)</b> | <b>3,91± 0,20 (b)</b>  |
|           | <b>ΔE</b>                | <b>10,94</b>            |                       |                       |                        |
|           | <b>Δ C*<sub>ab</sub></b> | <b>-2,27</b>            |                       |                       |                        |
|           | <b>ΔL</b>                | <b>10,48</b>            |                       |                       |                        |
|           | <b>Δa*</b>               | <b>2,25</b>             |                       |                       |                        |
|           | <b>Δb*</b>               | <b>-2,20</b>            |                       |                       |                        |

Values of each stone followed by the same letters in brackets in the same column are not significantly different by the Turkey HDS test at p<0.05.
